# Supplementary material for: Visual detection of microplastics using Raman spectroscopic imaging
Source: Royal Society of Chemistry journal article supplement (doi:10.1039/d3an01270k), 2023-10-31
Supplement: d3an01270k1.pdf [file d3an01270k1.pdf]

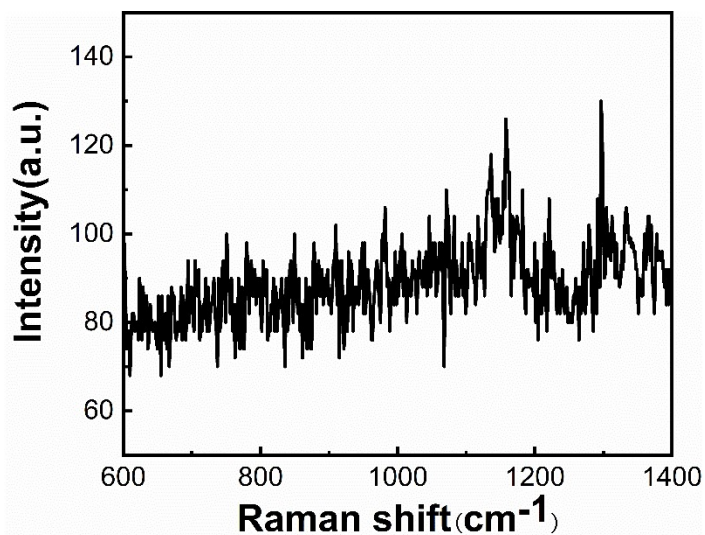

Figure. S1 Raman spectrum of PE under excitation wavelength of 785 nm

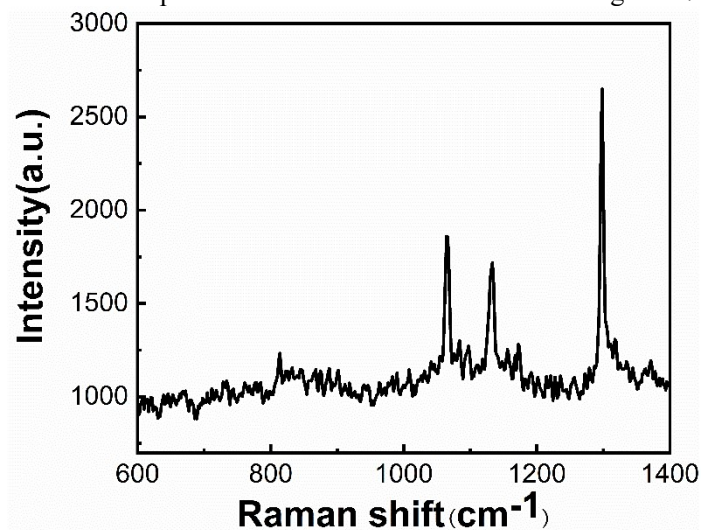

Figure. S2 Raman spectrum of PE under excitation wavelength of 532 nm

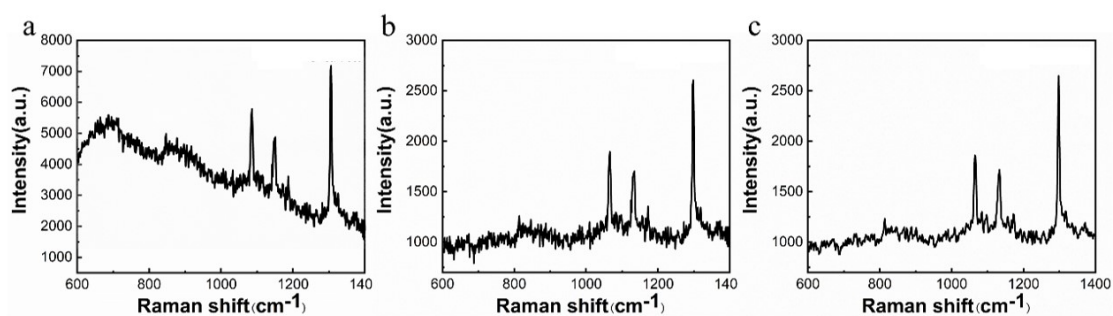

Figure. S3 The optimization results of the PE Raman spectra (a) original spectrum, (b) baseline-subtracted spectrum, and (c) smoothed spectrum
